# Supplementary material for: A flexible yet wear-resistant co-citrate elastomer for on-demand disposable patch sensors
Source: Royal Society of Chemistry journal article supplement (doi:10.1039/d0tc02058c), 2020-01-01

**Flexible yet wear-resistant co-citrate elastomer for on-demand  
disposable patch sensor**

Do-Gwan Kim<sup>1</sup>, Dowon Ahn<sup>2</sup>, Kang-Han Kim<sup>1</sup> and Yong-Cheol Jeong<sup>1,\*</sup>

*<sup>1</sup>Micro/Nano Scale Manufacturing R&D Department, KITECH  
143, Hangeulro, Sangnok-gu, Ansan, 15588, Republic of Korea*

*<sup>2</sup>Samsung SDI, 130 Samsung-ro, Yeongtong-gu, Suwon-si, Gyeonggi-do, 16678,  
Republic of Korea*

\*To whom all correspondence should be addressed. E-mail: ycjeong@kitech.re.kr  
Tel: +82-31-8040-6197 Fax: +82-31-8040-6430

**Figure S1.** Synthesis route of poly(1,8-octanediol-*co*-citrate)

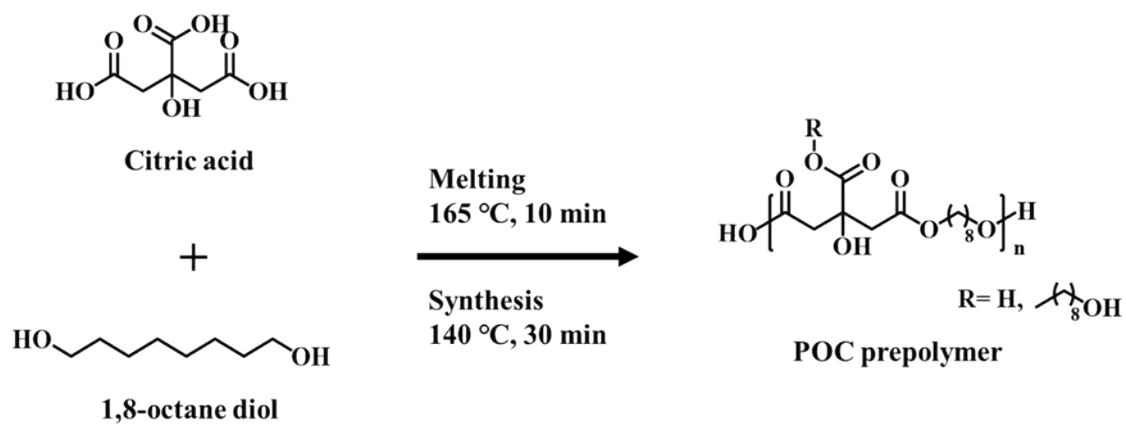

**Figure S2.** Synthesis route of PECSQ

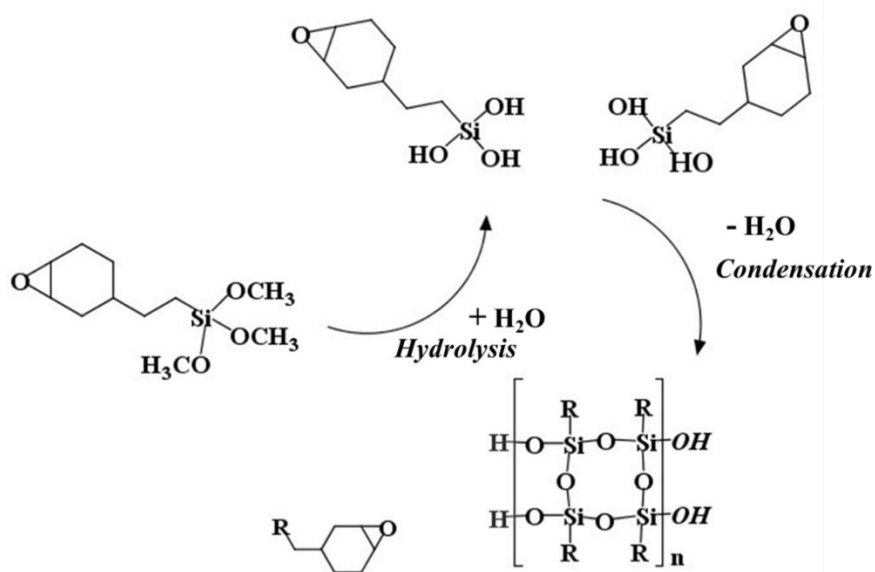

**Figure S3.** The FT-IR study of PECSQ. (A) FT-IR result of PECSQ sol, (B) FT-IR result of epoxy conversion through the curing process.

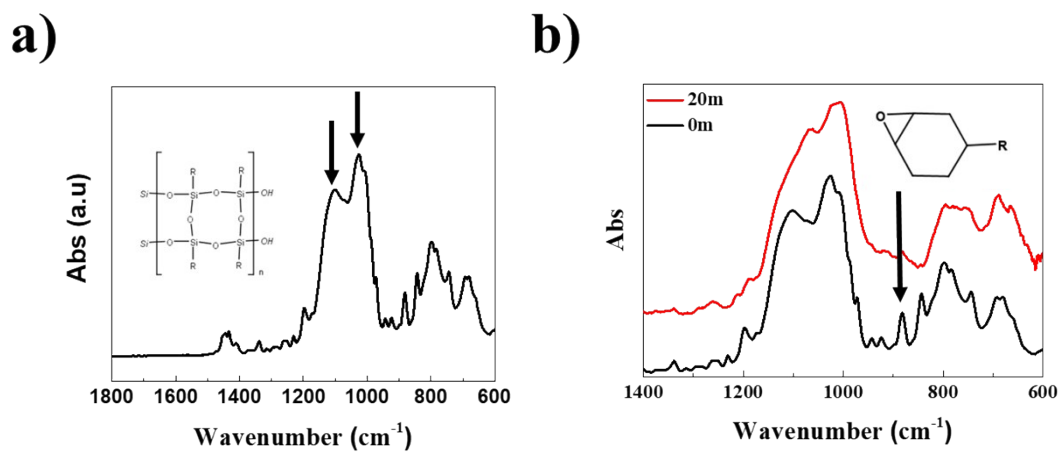

**Figure S4.** The FT-IR spectra of (A) citric acid and (B) 1,8-octanediol

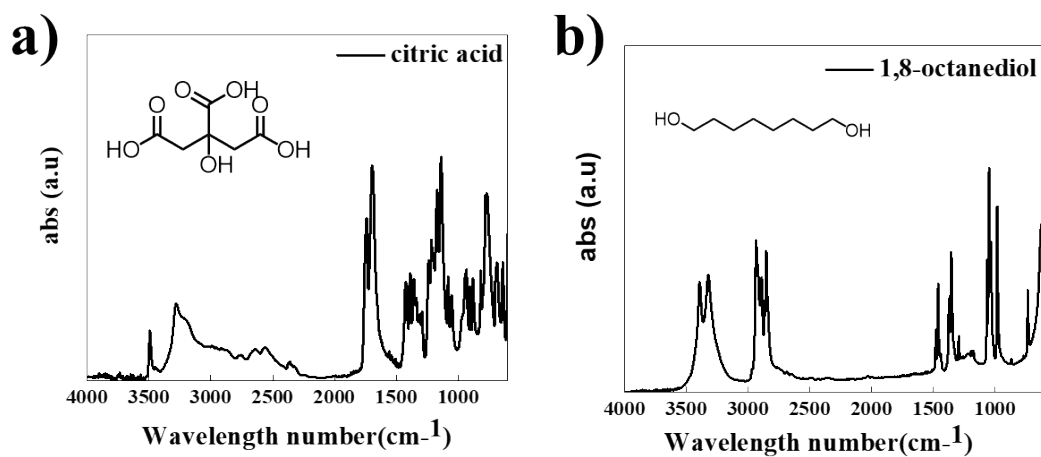

**Figure S5.** The H-NMR spectra of (a) POC prepolymer (b) PECSQ sol, (c) thermally cured POC<sub>90</sub>/PECSQ<sub>10</sub> elastomer

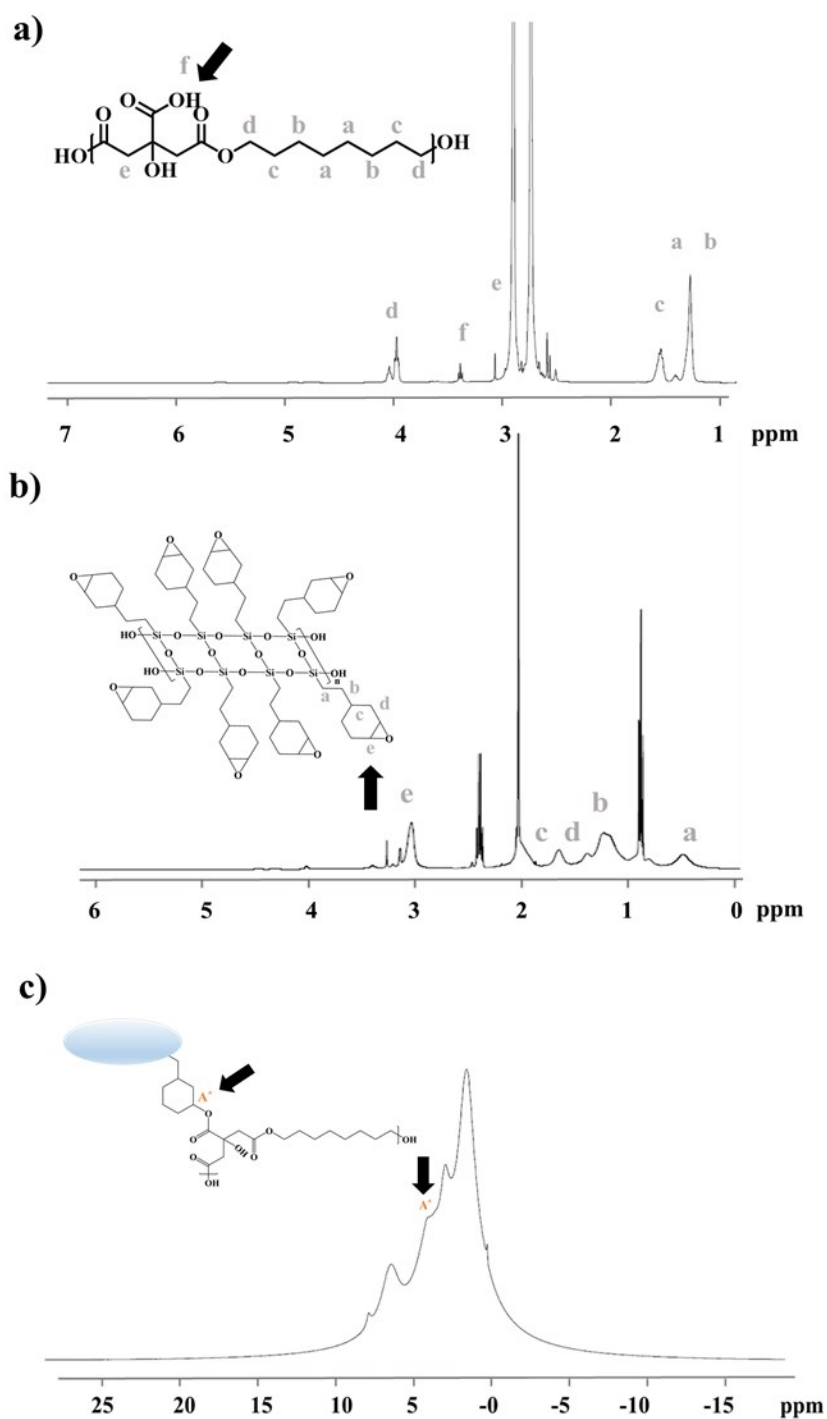

**Figure S6.** The change of glass transition temperature of (a) POC elastomer film as a function of baking time and POC/PECSQ elastomer film with respect to the solid contents of PECSQ

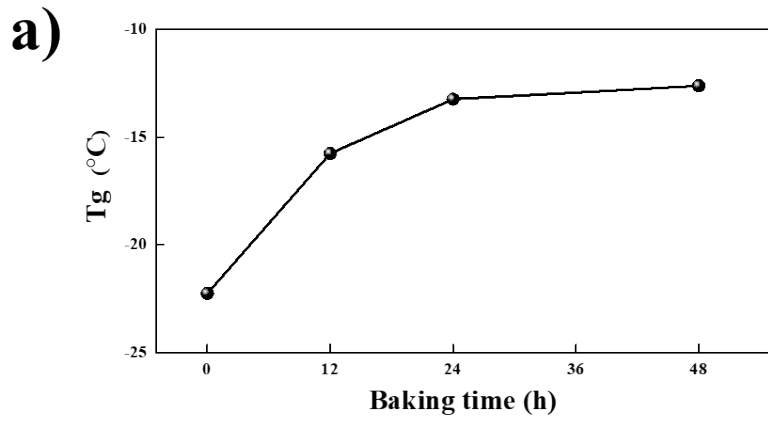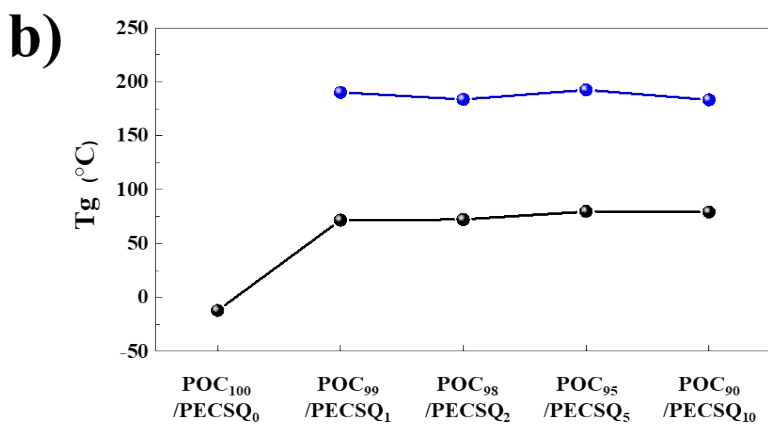

**Figure S7.** The degree of dissolution of POC elastomer film in DI water with different pH

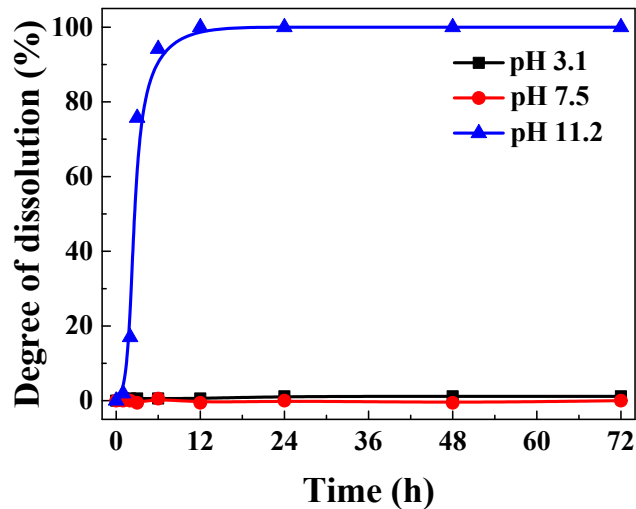

**Figure S8.** The dissolution behavior of POC/PECSQ elastomer film with laundry detergent-based water at (A) 60 °C and (B) 80 °C.

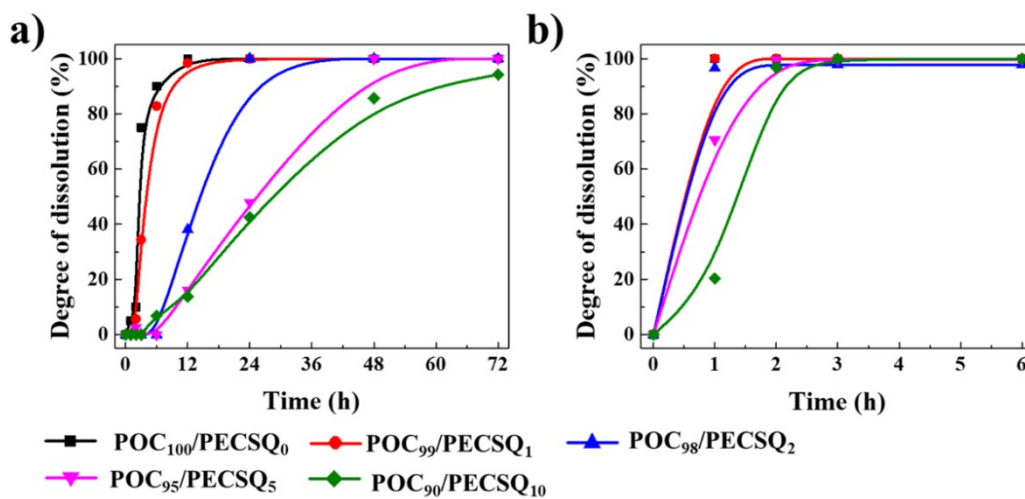

**Figure S9.** (a) FT-IR results of POC/PECSQ elastomer and POC/PECSQ-degraded dissolving medium (b) The pH variation behavior of POC film upon dissolution at various dissolving medium as a function of time

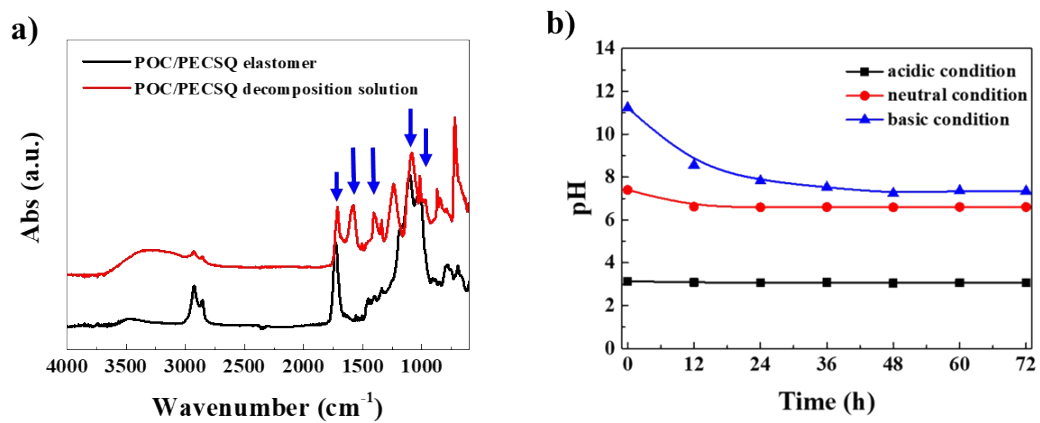

Supplement: d0tc02058c1.pdf [file d0tc02058c1.pdf]
